# Supplementary material
Source: Springer Nature journal article supplement (https://www.springermedizin.de/resource/supplementary/12881_2010_631_MOESM2_ESM.pdf/9451104)

Imprinted domain

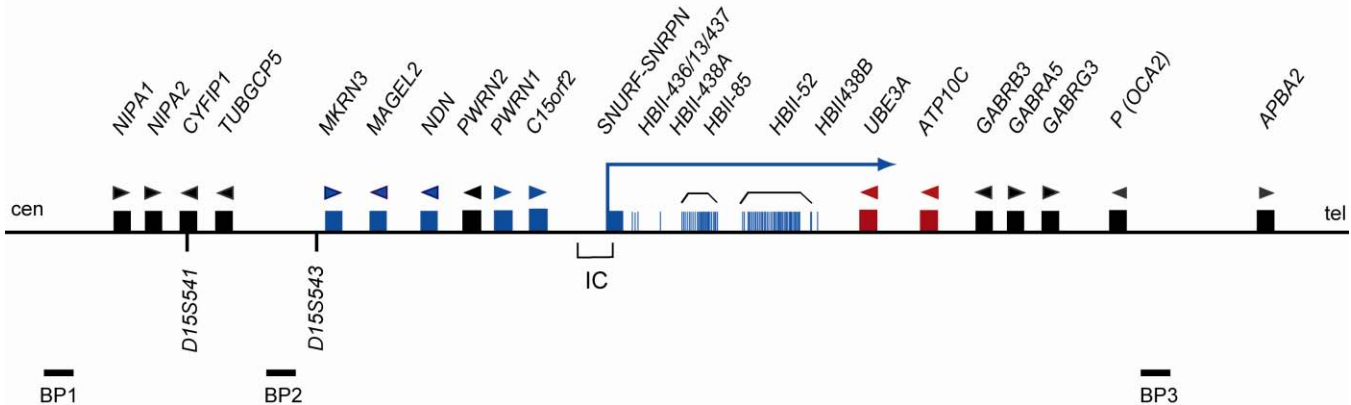

class I deletion

class II deletion

Supplement: MOESM2 [file 9451104]
